# Supplementary material for: Association between Stress Hyperglycemia Ratio and Mortality in Critically Ill COPD Patients: A Mediation Analysis of White Blood Cell Count
Source: Research Square preprint supplement (doi:10.21203/rs.3.rs-7448763/v1), 2025-10-20
Supplement: Supplementary file 1 [file 680009f61cf858b91fb280cc.docx]

Table S1. ICD Codes Used to Define COPD in This Study

| **ICD Version** | **Diagnosis Codes** |
| --- | --- |
| ICD-9 | 491.20 - 491.22 |
| ICD-10 | J44, J44.0, J44.1, J44.9, N11.1 |

Note: COPD was identified based on ICD-9 codes 491.20–491.22 and ICD-10 codes J44, J44.0, J44.1, J44.9, and N11.1.

Table S2. Overview of Missing Data in the Study Sample

| Variable | Valid Samples | Missing Samples | Missing Ratios |
| --- | --- | --- | --- |
| Demographic |  |  |  |
| Sex | 873 | 0 | 0.000 |
| Age | 873 | 0 | 0.000 |
| Health Status |  |  |  |
| Diabetes | 873 | 0 | 0.000 |
| Atrial Fibrillation | 873 | 0 | 0.000 |
| Anthropometric Measures | |  |  |
| Magnesium | 843 | 30 | 3.436 |
| Calcium | 783 | 90 | 10.309 |
| Red blood cells | 870 | 3 | 0.344 |
| White blood cells | 873 | 3 | 0.344 |
| Hemoglobin | 870 | 3 | 0.344 |
| RDW | 870 | 3 | 0.344 |
| Platelet count | 867 | 6 | 0.687 |
| INR | 781 | 92 | 10.538 |
| PT | 781 | 92 | 10.538 |
| Live time | 873 | 0 | 0.000 |
| First glucose | 873 | 0 | 0.000 |
| HbA1c | 873 | 0 | 0.000 |
| SHR | 873 | 0 | 0.000 |
| 28-day mortality | 873 | 0 | 0.000 |
| 365-day mortality | 873 | 0 | 0.000 |

Note: This table summarizes the missing data for each variable in the study cohort, including the number of valid samples, missing samples, and the corresponding missing rates.

Table S3. Univariate Cox Regression Analysis for 28-Day and 365-Day Mortality

| Item | 28-day mortality | | 365-day mortality | |
| --- | --- | --- | --- | --- |
| HR(95%CI) | P-value | HR(95%CI) | P-value |
| Sex (Male vs Female) | 1.06 (0.73,1.55) | 0.753 | 0.83 (0.65,1.07) | 0.145 |
| Admission age | 1.04 (1.02,1.06) | < 0.001 | 1.03 (1.02,1.04) | < 0.001 |
| Magnesium | 0.61 (0.42,0.91) | 0.014 | 0.65 (0.50,0.83) | < 0.001 |
| Calcium | 1.06 (0.87,1.30) | 0.552 | 1.13 (1.00,1.27) | 0.056 |
| RBC | 0.99 (0.79,1.25) | 0.939 | 0.98 (0.84,1.14) | 0.793 |
| HB | 1.00 (0.92,1.08) | 0.935 | 0.96 (0.91,1.02) | 0.183 |
| PLT | 1.00 (1.00,1.00) | 0.306 | 1.00 (1.00,1.00) | 0.054 |
| INR | 1.15 (0.95,1.38) | 0.142 | 1.14 (1.00,1.30) | 0.043 |
| PT | 1.01 (1.00,1.03) | 0.110 | 1.01 (1.00,1.02) | 0.045 |
| Diabetes (Yes vs No) | 1.12 (0.78,1.61) | 0.542 | 1.17 (0.91,1.49) | 0.218 |
| Atrial Fibrillation (Yes vs No) | 1.03 (0.71,1.48) | 0.895 | 1.11 (0.87,1.41) | 0.422 |

Note: HR = Hazard ratio; CI = Confidence interval. P-values were derived from Wald tests in univariate Cox regression models.

Table S4. Sensitivity Analyses Using SHR Quartiles to Evaluate the Association between SHR and Mortality in COPD Patients

| Categories | Unadjusted Model | | Model 1 | | Model 2 | | Model 3 | |
| --- | --- | --- | --- | --- | --- | --- | --- | --- |
| HR (95%CI) | P | HR (95%CI) | *P* | HR (95%CI) | *P* | HR (95%CI) | *P* |
| 28-day mortality |  |  |  |  |  |  |  |  |
| SHR | 1.46 (1.15~1.85) | 0.002 | 1.39 (1.11~1.76) | 0.005 | 1.36 (1.05~1.75) | 0.021 | 1.35 (1.04~1.73) | 0.024 |
| Quartiles |  |  |  |  |  |  |  |  |
| T1(0.28~0.84) | 1 (Ref) |  | 1 (Ref) |  | 1(Ref) |  | 1(Ref) |  |
| T2(0.84~1.04) | 1.10 (0.60~2.02) | 0.751 | 1.06 (0.58~1.94) | 0.853 | 1 .00 (0.54~1.85) | 0.990 | 0.99 (0.53~1.84) | 0.965 |
| T3(1.04~1.31) | 1.65 (0.95~2.89) | 0.078 | 1.58 (0.90~2.76) | 0.109 | 1.43 (0.81~2.54) | 0.219 | 1.43 (0.81~2.55) | 0.223 |
| T4(1.31~5.62) | 2.24 (1.31~3.81) | 0.003 | 2.30 (1.35~3.92) | 0.002 | 1.94 (1.12~3.34) | 0.020 | 1.93 (1.12~3.33) | 0.021 |
| P for trend |  | 0.001 |  | <0.001 |  | 0.006 |  | 0.006 |
| 365-day mortality |  |  |  |  |  |  |  |  |
| SHR | 1.43 (1.21~1.69) | <0.001 | 1.37 (1.16~1.61) | <0.001 | 1.33 (1.11~1.59) | 0.002 | 1.33 (1.11~1.59) | 0.002 |
| Quartiles |  |  |  |  |  |  |  |  |
| T1(0.28~0.84) | 1 (Ref) |  | 1 (Ref) |  | 1 (Ref) |  | 1 (Ref) |  |
| T2(0.84~1.04) | 1.33 (0.91~1.94) | 0.137 | 1.28 (0.88~1.87) | 0.201 | 1.21 (0.83~1.77) | 0.331 | 1.23 (0.84~1.82) | 0.293 |
| T3(1.04~1.31) | 1.52 (1.05~2.20) | 0.027 | 1.45 (1.00~2.10) | 0.049 | 1.35 (0.93~1.98) | 0.120 | 1.36 (0.93~2.00) | 0.118 |
| T4(1.31~5.62) | 1.88 (1.31~2.69) | 0.001 | 1.89 (1.32~2.71) | <0.001 | 1.64 (1.13~2.37) | 0.010 | 1.64 (1.13~2.38) | 0.009 |
| P for trend |  | <0.001 |  | <0.001 |  | 0.008 |  | 0.004 |

Note: T = Tertile; SHR = Stress hyperglycemia ratio; HR = Hazard ratio; CI = Confidence interval; Ref. = Reference.

Model 1: Adjusted for age and sex.

Model 2: Adjusted as in Model 1, additionally including magnesium, calcium, red blood cell count, hemoglobin, platelet count, international normalized ratio (INR), and prothrombin time (PT).

Model 3: Adjusted as in Model 2, plus diabetes and atrial fibrillation.

Table S5. Sensitivity Analyses Using SHR Quartiles and Quintiles to Evaluate the Association between SHR and Mortality in COPD Patients

| Categories | Unadjusted Model | | Model 1 | | Model 2 | | Model 3 | |
| --- | --- | --- | --- | --- | --- | --- | --- | --- |
| HR (95%CI) | *P* | HR (95%CI) | *P* | HR (95%CI) | *P* | HR (95%CI) | *P* |
| 28-day mortality |  |  |  |  |  |  |  |  |
| SHR | 1.46 (1.15~1.85) | 0.002 | 1.39 (1.11~1.76) | 0.005 | 1.36 (1.05~1.75) | 0.021 | 1.35 (1.04~1.73) | 0.024 |
| Quintiles |  |  |  |  |  |  |  |  |
| T1(0.28~0.80) | 1 (Ref) |  | 1 (Ref) |  | 1 (Ref) |  | 1 (Ref) |  |
| T2(0.80~0.96) | 1.00 (0.51~1.96) | 0.997 | 0.96 (0.49~1.88) | 0.909 | 0.97 (0.49~1.92) | 0.934 | 0.96 (0.48~1.92) | 0.907 |
| T3(0.96~1.12) | 1.19 (0.62~2.27) | 0.601 | 1.15 (0.60~2.20) | 0.664 | 1.04 (0.54~2.02) | 0.899 | 1.06 (0.55~2.06) | 0.862 |
| T4(1.12~1.38) | 1.59 (0.86~2.93) | 0.136 | 1.49 (0.81~2.76) | 0.201 | 1.40 (0.75~2.63) | 0.298 | 1.41 (0.75~2.66) | 0.290 |
| T5(1.38~5.62) | 2.28 (1.28~4.07) | 0.005 | 2.37 (1.33~4.23) | 0.003 | 1.98 (1.09~3.6) | 0.027 | 1.99 (1.09~3.61) | 0.027 |
| P for trend |  | 0.001 |  | 0.001 |  | 0.008 |  | 0.007 |
| 365-day mortality |  |  |  |  |  |  |  |  |
| SHR | 1.43 (1.21~1.69) | <0.001 | 1.37 (1.16~1.61) | <0.001 | 1.33 (1.11~1.59) | 0.002 | 1.33 (1.11~1.59) | 0.002 |
| Quintiles |  |  |  |  |  |  |  |  |
| T1(0.28~0.80) | 1 (Ref) |  | 1 (Ref) |  | 1 (Ref) |  | 1 (Ref) |  |
| T2(0.80~0.96) | 1.27 (0.82~1.96) | 0.280 | 1.22 (0.79~1.88) | 0.372 | 1.21 (0.78~1.88) | 0.393 | 1.24 (0.79~1.94) | 0.353 |
| T3(0.96~1.12) | 1.40 (0.92~2.15) | 0.119 | 1.37 (0.90~2.10) | 0.145 | 1.34 (0.87~2.06) | 0.189 | 1.36 (0.88~2.12) | 0.170 |
| T4(1.12~1.38) | 1.67 (1.11~2.53) | 0.015 | 1.56 (1.03~2.36) | 0.037 | 1.51 (0.98~2.31) | 0.061 | 1.52 (0.99~2.34) | 0.057 |
| T5(1.38~5.62) | 2.11 (1.42~3.16) | <0.001 | 2.16 (1.45~3.23) | <0.001 | 1.85 (1.22~2.8) | 0.004 | 1.86(1.23~2.82) | 0.004 |
| P for trend |  | <0.001 |  | <0.001 |  | 0.002 |  | 0.002 |

Note: T = Tertile; SHR = Stress hyperglycemia ratio; HR = Hazard ratio; CI = Confidence interval; Ref. = Reference.

Model 1: Adjusted for age and sex.

Model 2: Adjusted as in Model 1 plus magnesium, calcium, red blood cell count, hemoglobin, platelet count, international normalized ratio (INR), and prothrombin time (PT).

Model 3: Adjusted as in Model 2 plus diabetes and atrial fibrillation.
